# Supplementary material
Source: PubMed Central journal article supplement (PMC5381517)
Supplement: NIHMS814026-supplement-online_repository_and_etables.pdf [file NIHMS814026-supplement-online_repository_and_etables.pdf]

1 **Pathways through which Asthma Risk Factors Contribute to Asthma Severity**  
2 **in Inner-City Children**

3  
4 **Online Repository**  
5

6 Andrew H. Liu,<sup>1</sup> Denise C. Babineau,<sup>2</sup> Rebecca Z. Krouse,<sup>2</sup> Edward M. Zoratti,<sup>3</sup> Jacqueline A.  
7 Pongracic,<sup>4</sup> George T. O'Connor,<sup>5</sup> Robert A. Wood,<sup>6</sup> Gurjit K. Khurana Hershey,<sup>7</sup> Carolyn M.  
8 Kerckmar,<sup>7</sup> Rebecca S. Gruchalla,<sup>8</sup> Meyer Kattan,<sup>9</sup> Stephen J. Teach,<sup>10</sup> Melanie Makhija,<sup>4</sup>  
9 Dinesh Pillai,<sup>10</sup> Carin I. Lamm,<sup>9</sup> James E. Gern,<sup>11</sup> Steven M. Sigelman,<sup>12</sup> Peter J. Gergen,<sup>12</sup> Alkis  
10 Toggias,<sup>12</sup> Cynthia M. Visness,<sup>2</sup> William W. Busse<sup>11</sup>

11  
12 <sup>1</sup> National Jewish Health, Denver, CO, and Children's Hospital Colorado and University of  
13 Colorado School of Medicine, Aurora, CO

14 <sup>2</sup> Rho Federal Systems Division, Chapel Hill, NC

15 <sup>3</sup> Henry Ford Health System, Detroit, MI

16 <sup>4</sup> Ann and Robert H. Lurie Children's Hospital of Chicago, Chicago, IL

17 <sup>5</sup> Boston University School of Medicine, Boston, MA

18 <sup>6</sup> Johns Hopkins University School of Medicine, Baltimore, MD<sup>7</sup> Cincinnati Children's Hospital,  
19 Cincinnati, OH

20 <sup>8</sup> University of Texas Southwestern Medical Center, Dallas, TX

21 <sup>9</sup> College of Physicians and Surgeons, Columbia University, New York, NY

22 <sup>10</sup> Children's National Health System and the George Washington University School of Medicine  
23 and Health Sciences, Washington, DC

24 <sup>11</sup> University of Wisconsin School of Medicine and Public Health, Madison, WI

25 <sup>12</sup> National Institute of Allergy and Infectious Diseases, Bethesda, MD  
26

27 **Background Supporting the Conceptual Model of Asthma Severity**

28 Based on clinical and mechanistic evidence in the published literature and consensus among  
29 investigators, a conceptual model was developed to hypothetically describe how 8 risk factor  
30 domains of allergen sensitization, allergic inflammation, pulmonary physiology, stress, obesity,  
31 Vitamin D, environmental tobacco smoke (ETS) exposure and rhinitis severity are linked to  
32 asthma severity (Figure 1). The basis for constructing this model and its pathways are  
33 discussed in the following sections.

34

35 **Allergy Pathway**

36 *Ample evidence links allergic sensitization and IgE to allergic inflammation, pulmonary*

37 *physiology and asthma severity, especially in children.* In a birth cohort study of BHR in New

38 Zealand children, serum total IgE measured at age 11 years was associated with asthma and

39 highly correlated with methacholine BHR in asthmatic and non-asthmatic children.<sup>1</sup> Even more

40 so, in the same cohort, a multivariable analysis demonstrated a stronger correlation of the

41 number of positive allergy skin tests to cat, dog, mite and Aspergillus determined at age 13

42 years with BHR, as well as airflow limitation by FEV<sub>1</sub>/FVC and FEV<sub>1</sub> (% predicted).<sup>2</sup> In the

43 Childhood Asthma Management Program (CAMP) study and the Severe Asthma Research

44 Program (SARP), asthma phenotypes with greater disease severity manifest with more

45 exacerbations, greater lung dysfunction (i.e., airflow limitation, methacholine BHR and

46 bronchodilator responsiveness), higher levels of total serum IgE, peripheral blood eosinophils,

47 FeNO, and greater number of allergen sensitizations.<sup>3,4</sup> The severe asthma phenotype in

48 children is consistent with a severe 'Th2-high' phenotype in adults, with IL-13-induced epithelial

49 gene expression (e.g., periostin), allergic inflammation (i.e., BAL and blood eosinophilia, higher

50 total serum IgE), greater lung dysfunction (i.e., BHR, BD response), and exacerbation risk.<sup>5</sup>

51

52 Asthma severity and exacerbations are associated with allergen sensitization and exposure to  
53 indoor allergens: house dust mite,<sup>6</sup> cockroach,<sup>7</sup> rodents,<sup>8-13</sup> molds,<sup>14-18</sup> and pets.<sup>6,14</sup> Sensitization  
54 to dust mite, dog and/or cat, especially when combined with high levels of home exposure, is  
55 also associated with asthma persistence and lower lung function through childhood.<sup>19,20</sup> A  
56 recent update review on indoor exposures affecting asthma exacerbations of a 2000 Institute of  
57 Medicine report (*Clearing the Air: Asthma and Indoor Air Exposures*)<sup>21,22</sup> found sufficient  
58 evidence for causal relationships or associations between common indoor allergens (mite, cat,  
59 cockroach, mold, dog) and asthma exacerbations in allergen-sensitized individuals. Allergen  
60 sensitization to common foods has also been linked to asthma severity and exacerbations.<sup>23,24</sup>  
61  
62 The Inner City Asthma Study (ICAS) study revealed that 94% of the cohort of inner city children  
63 with moderate to severe asthma were sensitized to at least one perennial inhalant allergen, of  
64 which 50% were sensitized to 3 or more, and had a high frequency of home exposures to  
65 dampness/mold (45%), cockroach (58%), rodents (39%), and furry pets (28%).<sup>25</sup> For inner-city  
66 children with asthma, their schools can also be a significant source of allergen exposure that  
67 worsens their asthma. High levels of mouse<sup>26,27</sup> and mold<sup>28,29</sup> allergens in inner-city schools  
68 have been associated with increased asthma symptom days in sensitized children. Inner-City  
69 asthma studies have also shown that therapeutically blocking IgE-mediated responses with  
70 omalizumab reduced asthma exacerbations and improved asthma symptoms and control<sup>30,31</sup>.  
71 Since most inner-city children with moderate to severe asthma are sensitized to multiple indoor  
72 allergens, with exposure at home and/or school being common, the allergy pathway may be  
73 particularly relevant to this study.

74

75 Allergic sensitization is linked to allergic inflammation. IgE antibodies to inhalant allergens are  
76 essential mediators of allergen-driven inflammation in asthma. In children with asthma, the  
77 number of positive inhalant allergen prick skin tests and total serum IgE levels correlated with

78 sputum eosinophils<sup>32</sup> and FeNO.<sup>33,34</sup> In cat, dog, or mite sensitized asthmatics, specific allergen  
79 exposure is associated with increased FeNO.<sup>6,35</sup>

80

81 Allergic inflammatory markers are correlated with airway inflammation and each other. Sputum  
82 eosinophilia correlates with FeNO and peripheral blood eosinophilia,<sup>32</sup> and FeNO correlates with  
83 peripheral blood eosinophilia.<sup>33</sup>

84

85 Allergic inflammation is associated with pulmonary physiology. Sputum eosinophilia and FeNO  
86 are correlated with greater BHR, bronchodilator reversibility, and airflow limitation.<sup>32,33,36</sup>

87

88 Allergic inflammation is also linked to asthma severity. Sputum eosinophilia is associated with  
89 asthma exacerbations, beta-agonist rescue use, and frequency of nocturnal symptoms.<sup>32</sup>

90 Elevated FeNO level is an indicator of greater asthma severity and poor control (i.e., beta-  
91 agonist use, day- and night-time symptoms, spirometry).<sup>37,38</sup>

92

93 Allergic rhinitis can affect asthma severity. Allergic rhinitis is reported in 85 – 95% of allergic  
94 asthmatics, and clinical rhinitis severity is associated with asthma severity.<sup>39</sup> Nasal obstruction  
95 due to rhinitis could reduce or bypass the usual nasal functions of warming, humidifying, and  
96 filtering respirable air, thereby reducing these common asthma triggers. Allergic inflammation  
97 and other provocative stimuli in the nose can also affect asthma severity directly and indirectly  
98 via pulmonary physiology. In patients with allergic rhinitis and asthma, nasal allergen challenge  
99 induced nasal and lower airways eosinophilia, methacholine BHR, and late-phase airflow  
100 limitation.<sup>39-41</sup> Similarly, in patients with rhinitis and asthma, nasal inhalation of cold air or  
101 mucosal application of methacholine increased lower airways resistance.<sup>42,43</sup> In some studies,  
102 treatment of allergic rhinitis with intranasal corticosteroids improved FEV<sub>1</sub>, bronchial  
103 hyperreactivity, asthma symptom scores, and rescue medication use.<sup>44</sup> Also, treating allergic

104 rhinitis with nasal corticosteroids and antihistamines reduces the risk for asthma-related ER  
105 visits and hospitalizations.<sup>45</sup>

106

107 Pulmonary physiology is linked to asthma severity. Spirometric measures of airflow are  
108 frequently used as an objective marker of asthma severity in guidelines-based care.<sup>46,47</sup>

109 Persistent airway obstruction (e.g., low FEV<sub>1</sub>/FVC) has been shown to develop in a subgroup of  
110 children with asthma and is associated with disease severity and morbidity.<sup>36,48-50</sup> In the CAMP  
111 study, airflow limitation (pre-BD FEV<sub>1</sub> % predicted) was associated with subsequent asthma  
112 symptoms and exacerbation risk,<sup>51</sup> and bronchial hyperreactivity to methacholine correlated with  
113 airflow limitation, asthma symptoms, and clinical severity.<sup>52</sup> Cluster analysis studies to  
114 distinguish childhood asthma phenotypes have associated greater allergy, allergic inflammation  
115 and lung dysfunction with more clinically severe disease.<sup>3,4</sup>

116

### 117 **Environmental Tobacco Smoke (ETS) Pathway**

118 ETS exposure can affect asthma severity directly and through its effects on allergic

119 inflammation and pulmonary physiology. A recent Cochrane-based meta-analysis of ETS  
120 exposure and asthma severity in children<sup>53</sup> and an update of a 2000 Institute of Medicine  
121 report<sup>21,22</sup> demonstrated an increased risk and suggestive evidence of associations between  
122 ETS exposure and reduced lung function (FEV<sub>1</sub>/FVC ratio), wheezing symptoms, and ED visits  
123 and hospitalizations for asthma. In the Severe Asthma Research Program, children and adults  
124 with ETS exposure had lower lung function, greater bronchodilator response, and greater risk of  
125 severe exacerbations.<sup>54</sup> In urban children with inner-city demographic features (57% African  
126 American, 76% Medicaid), detectable serum and salivary cotinine (i.e., biomarkers for ETS  
127 exposure) were common in children hospitalized for asthma, and were also associated with  
128 subsequent hospital re-admission.<sup>55</sup> ETS exposure has also been shown to be negatively  
129 associated with FeNO levels in allergic asthmatic children and normal subjects.<sup>56-58</sup> The ETS

130 pathway may be particularly relevant to explaining asthma severity because most (48-75%)  
131 inner-city children with asthma reside in households with smokers, have detectable tobacco  
132 smoke exposure in their homes, or have elevated urine cotinine levels indicating ETS  
133 exposure.<sup>25,59-62</sup>

134

### 135 **Vitamin D Pathway**

136 *Vitamin D could affect asthma severity through its effects on allergic inflammation and*

137 *pulmonary physiology.* Vitamin D could decrease asthma severity by enhancing corticosteroid

138 responses that could effectively reduce airway inflammation.<sup>63</sup> In adults with asthma, reduced

139 vitamin D levels were associated with impaired lung function, increased BHR, and reduced *in*

140 *vitro* corticosteroid responsiveness.<sup>64</sup> In the CAMP study, children who received daily

141 corticosteroid had less improvement in FEV<sub>1</sub> if they were vitamin D deficient (total 25-

142 hydroxyvitamin D <20 ng/mL) versus insufficient (<30 ng/mL) or sufficient.<sup>65</sup> Vitamin D might also

143 mitigate the risk of asthma exacerbations by the induction of innate anti-microbial and anti-

144 inflammatory responses, although specific mechanisms are less clear.<sup>66</sup> In the CAMP study,

145 vitamin D insufficiency was associated with being African American and having an increased

146 risk of asthma hospitalization or ER visits.<sup>67</sup> In children with asthma in Costa Rica and Puerto

147 Rico, vitamin D insufficiency was associated with increased peripheral blood eosinophils, lower

148 FEV<sub>1</sub>/FVC, increased methacholine BHR, and a history of exacerbations.<sup>68,69</sup> However, in a

149 nationalized study of inner city adolescents with asthma, vitamin D levels were not associated

150 with asthma symptoms, control, exacerbations, lung function, or FeNO.<sup>70</sup> A recent systematic

151 review and meta-analysis of vitamin D supplementation clinical trials in children with asthma

152 suggested a statistically significant reduction in exacerbation risk in treated versus controls

153 (relative risk 0.41, 5-95% confidence interval 0.27-0.63), without adequate evidence to draw

154 conclusions about other outcomes.<sup>71</sup> Considering that Black urban children in Washington D.C.

155 with asthma had a much higher prevalence of vitamin D insufficiency and deficiency when

156 compared with their matched non-asthmatic controls,<sup>72</sup> inner-city children with asthma may be  
157 particularly susceptible to concerns related to vitamin D insufficiency, supporting the relevance  
158 of this vitamin D pathway in our study.

159

## 160 **Stress Pathway**

161 *Psychosocial stress can affect asthma severity directly and through its effects on allergic*  
162 *inflammation and pulmonary physiology.* The stressors associated with inner-city living can  
163 influence adverse asthma outcomes in a number of ways. In inner-city children and adolescents,  
164 violence and severely negative or stressful life events were associated with increased day and  
165 night symptoms of asthma and exacerbation/hospitalization risk.<sup>73-75</sup> Caretaker-perceived stress  
166 also mediated the effects of violence or severely negative life events on asthma symptoms and  
167 attacks.<sup>73,76</sup>

168

169 Psychosocial stress has been associated with allergic inflammation. Asthmatic children living in  
170 lower SES had higher chronic stress and perceived threat, which was associated with higher IL-  
171 5 and IL-13 production in PMA/ionomycin-stimulated PBMC, and peripheral blood  
172 eosinophilia.<sup>77</sup> In children with asthma, stress-induced increases in FeNO were more  
173 pronounced in those living in lower SES.<sup>78</sup> A prolonged stressor, the final exam period in  
174 asthmatic college students, enhanced sputum eosinophilia and a shift towards a Th2 mRNA  
175 profile following allergen challenge.<sup>79</sup> In other social science experiments, social and arithmetic  
176 stressors were associated with increased FeNO in patients with and without asthma.<sup>80,81</sup>

177

178 Psychosocial stress and intense emotions can also increase airflow limitation. With intense  
179 anger or fear, children with asthma had declines in FEV<sub>1</sub> that improved with relaxation.<sup>82</sup> In  
180 response to emotional or psychological stressors, airways resistance measured by impulse  
181 oscillometry increased, such that 22% of children with asthma had a greater than 20%

182 increase.<sup>83,84</sup> Considering the high levels of perceived stress and stressful events associated  
183 with inner city living, this stress pathway seems relevant to this APIC cohort study.

184

### 185 **Obesity Pathway**

186 Obesity has been linked to asthma severity, both directly and via pulmonary physiology. Among  
187 inner-city asthmatic subjects in the ICAC ACE Study, the prevalence of obesity (BMI > 95th  
188 percentile BMI-for-age reference values) was 34% in boys and 37% in girls.<sup>85</sup> This study also  
189 found that higher BMI correlated with more frequent asthma symptoms, lower ACT scores, and  
190 the occurrence of exacerbations among females but not males. Others have reported that  
191 obese asthmatic children are more likely to have asthma exacerbations and other clinical  
192 markers of severe disease<sup>86</sup> are less responsive to corticosteroid (ICS) than their non-obese  
193 counterparts.<sup>87,88</sup> In the CAMP study, children who became obese developed significant airflow  
194 limitation, as measured by FEV<sub>1</sub>/FVC.<sup>89</sup> Obese asthmatic adults in a randomized, controlled  
195 weight loss program for 3 months, had a mean weight loss of 16.5 kg and significant  
196 improvement in bronchial hyperreactivity to methacholine, FEV<sub>1</sub>, and asthma control, without  
197 improvements in the control group.<sup>90</sup> In black and Latino children and adolescents with asthma,  
198 obesity was associated with bronchodilator unresponsiveness, and obese, bronchodilator-  
199 unresponsive children reported more wheezing, night awakening, and higher-level controller  
200 usage.<sup>91</sup> Residents of low-income, inner-city communities in the US have a high prevalence of  
201 obesity.<sup>92</sup> Because our APIC cohort is largely comprised of black and Latino children, the  
202 obesity pathway may be particularly relevant to this study.

203

204 **REFERENCES**

- 205 1. Sears MR, Burrows B, Flannery EM, Herbison GP, Hewitt CJ, Holdaway MD. Relation  
206 between airway responsiveness and serum IgE in children with asthma and in  
207 apparently normal children. *The New England journal of medicine* 1991;325:1067-71.
- 208 2. Burrows B, Sears MR, Flannery EM, Herbison GP, Holdaway MD, Silva PA. Relation of  
209 the course of bronchial responsiveness from age 9 to age 15 to allergy. *American journal*  
210 *of respiratory and critical care medicine* 1995;152:1302-8.
- 211 3. Howrylak JA, Fuhlbrigge AL, Strunk RC, et al. Classification of childhood asthma  
212 phenotypes and long-term clinical responses to inhaled anti-inflammatory medications. *J*  
213 *Allergy Clin Immunol* 2014;133:1289-300, 300 e1-12.
- 214 4. Fitzpatrick AM, Teague WG, Meyers DA, et al. Heterogeneity of severe asthma in  
215 childhood: confirmation by cluster analysis of children in the National Institutes of  
216 Health/National Heart, Lung, and Blood Institute Severe Asthma Research Program. *J*  
217 *Allergy Clin Immunol* 2011;127:382-9 e1-13.
- 218 5. Woodruff PG, Modrek B, Choy DF, et al. T-helper type 2-driven inflammation defines  
219 major subphenotypes of asthma. *American journal of respiratory and critical care*  
220 *medicine* 2009;180:388-95.
- 221 6. Langley SJ, Goldthorpe S, Craven M, Morris J, Woodcock A, Custovic A. Exposure and  
222 sensitization to indoor allergens: association with lung function, bronchial reactivity, and  
223 exhaled nitric oxide measures in asthma. *J Allergy Clin Immunol* 2003;112:362-8.
- 224 7. Rosenstreich DL, Eggleston P, Kattan M, et al. The role of cockroach allergy and  
225 exposure to cockroach allergen in causing morbidity among inner-city children with  
226 asthma. *The New England journal of medicine* 1997;336:1356-63.
- 227 8. Phipatanakul W, Eggleston PA, Wright EC, Wood RA. Mouse allergen. I. The prevalence  
228 of mouse allergen in inner-city homes. *The National Cooperative Inner-City Asthma*  
229 *Study. J Allergy Clin Immunol* 2000;106:1070-4.

- 230 9. Phipatanakul W, Eggleston PA, Wright EC, Wood RA, National Cooperative Inner-City  
231 Asthma S. Mouse allergen. II. The relationship of mouse allergen exposure to mouse  
232 sensitization and asthma morbidity in inner-city children with asthma. *J Allergy Clin*  
233 *Immunol* 2000;106:1075-80.
- 234 10. Pongracic JA, Visness CM, Gruchalla RS, Evans R, 3rd, Mitchell HE. Effect of mouse  
235 allergen and rodent environmental intervention on asthma in inner-city children. *Ann*  
236 *Allergy Asthma Immunol* 2008;101:35-41.
- 237 11. Torjusen EN, Diette GB, Breyse PN, Curtin-Brosnan J, Aloe C, Matsui EC. Dose-  
238 response relationships between mouse allergen exposure and asthma morbidity among  
239 urban children and adolescents. *Indoor air* 2013;23:268-74.
- 240 12. Ahluwalia SK, Peng RD, Breyse PN, et al. Mouse allergen is the major allergen of  
241 public health relevance in Baltimore City. *J Allergy Clin Immunol* 2013;132:830-5 e1-2.
- 242 13. Perry T, Matsui E, Merriman B, Duong T, Eggleston P. The prevalence of rat allergen in  
243 inner-city homes and its relationship to sensitization and asthma morbidity. *J Allergy Clin*  
244 *Immunol* 2003;112:346-52.
- 245 14. Nelson HS, Szeffler SJ, Jacobs J, Huss K, Shapiro G, Sternberg AL. The relationships  
246 among environmental allergen sensitization, allergen exposure, pulmonary function, and  
247 bronchial hyperresponsiveness in the Childhood Asthma Management Program. *J*  
248 *Allergy Clin Immunol* 1999;104:775-85.
- 249 15. O'Connor G T, Walter M, Mitchell H, et al. Airborne fungi in the homes of children with  
250 asthma in low-income urban communities: The Inner-City Asthma Study. *J Allergy Clin*  
251 *Immunol* 2004;114:599-606.
- 252 16. Pongracic JA, O'Connor GT, Muilenberg ML, et al. Differential effects of outdoor versus  
253 indoor fungal spores on asthma morbidity in inner-city children. *J Allergy Clin Immunol*  
254 2010;125:593-9.

- 255 17. Sharpe RA, Bearman N, Thornton CR, Husk K, Osborne NJ. Indoor fungal diversity and  
256 asthma: a meta-analysis and systematic review of risk factors. *J Allergy Clin Immunol*  
257 2015;135:110-22.
- 258 18. Vicencio AG, Santiago MT, Tsirilakis K, et al. Fungal sensitization in childhood persistent  
259 asthma is associated with disease severity. *Pediatr Pulmonol* 2014;49:8-14.
- 260 19. Illi S, von Mutius E, Lau S, et al. Perennial allergen sensitisation early in life and chronic  
261 asthma in children: a birth cohort study. *Lancet* 2006;368:763-70.
- 262 20. Sears MR, Greene JM, Willan AR, et al. A longitudinal, population-based, cohort study of  
263 childhood asthma followed to adulthood. *The New England journal of medicine*  
264 2003;349:1414-22.
- 265 21. Institute of Medicine (U.S.). Committee on the Assessment of Asthma and Indoor Air.  
266 *Clearing the air : asthma and indoor air exposures*. Washington, D.C.: National Academy  
267 Press; 2000.
- 268 22. Kanchongkittiphon W, Mendell MJ, Gaffin JM, Wang G, Phipatanakul W. Indoor  
269 environmental exposures and exacerbation of asthma: an update to the 2000 review by  
270 the Institute of Medicine. *Environmental health perspectives* 2015;123:6-20.
- 271 23. Liu AH, Jaramillo R, Sicherer SH, et al. National prevalence and risk factors for food  
272 allergy and relationship to asthma: results from the National Health and Nutrition  
273 Examination Survey 2005-2006. *J Allergy Clin Immunol* 2010;126:798-806 e13.
- 274 24. Wang J, Visness CM, Sampson HA. Food allergen sensitization in inner-city children  
275 with asthma. *J Allergy Clin Immunol* 2005;115:1076-80.
- 276 25. Crain EF, Walter M, O'Connor GT, et al. Home and allergic characteristics of children  
277 with asthma in seven U.S. urban communities and design of an environmental  
278 intervention: the Inner-City Asthma Study. *Environmental health perspectives*  
279 2002;110:939-45.

- 280 26. Permaul P, Petty C, Sheehan W, et al. Mouse Allergen Exposure in Urban Schools and  
281 its Effect on Childhood Asthma Morbidity. *J Allergy and Clin Immunol* 2013;131:AB 141.
- 282 27. Sheehan WJ, Rangsithienchai PA, Muilenberg ML, et al. Mouse allergens in urban  
283 elementary schools and homes of children with asthma. *Ann Allergy Asthma Immunol*  
284 2009;102:125-30.
- 285 28. Baxi S, Petty C, Fu C, et al. Classroom Fungal Spore Exposure and Asthma Morbidity in  
286 Inner-City School Children. *J Aller Clin Immunol* 2013;131:AB 54.
- 287 29. Baxi S, Sheehan WJ, Permaul P, et al. Airborne Fungus Diversity and Concentrations in  
288 Inner City Elementary Schools *Ped Aller Immunol* 2013;24:697-703.
- 289 30. Busse WW, Morgan WJ, Gergen PJ, et al. Randomized trial of omalizumab (anti-IgE) for  
290 asthma in inner-city children. *The New England journal of medicine* 2011;364:1005-15.
- 291 31. Teach SJ, Gergen PJ, Szeffler SJ, et al. Seasonal risk factors for asthma exacerbations  
292 among inner-city children. *J Allergy Clin Immunol* 2015;135:1465-73 e5.
- 293 32. Covar RA, Spahn JD, Martin RJ, et al. Safety and application of induced sputum  
294 analysis in childhood asthma. *J Allergy Clin Immunol* 2004;114:575-82.
- 295 33. Strunk RC, Szeffler SJ, Phillips BR, et al. Relationship of exhaled nitric oxide to clinical  
296 and inflammatory markers of persistent asthma in children. *J Allergy Clin Immunol*  
297 2003;112:883-92.
- 298 34. Spanier AJ, Hornung R, Lierl M, Lanphear BP. Environmental exposures and exhaled  
299 nitric oxide in children with asthma. *J Pediatr* 2006;149:220-6.
- 300 35. Simpson A, Custovic A, Pipis S, Adisesh A, Faragher B, Woodcock A. Exhaled nitric  
301 oxide, sensitization, and exposure to allergens in patients with asthma who are not  
302 taking inhaled steroids. *American journal of respiratory and critical care medicine*  
303 1999;160:45-9.

- 304 36. Szeffler SJ, Mitchell H, Sorkness CA, et al. Management of asthma based on exhaled  
305 nitric oxide in addition to guideline-based treatment for inner-city adolescents and young  
306 adults: a randomised controlled trial. *Lancet* 2008;372:1065-72.
- 307 37. Meyts I, Proesmans M, De Boeck K. Exhaled nitric oxide corresponds with office  
308 evaluation of asthma control. *Pediatr Pulmonol* 2003;36:283-9.
- 309 38. Delgado-Corcoran C, Kisson N, Murphy SP, Duckworth LJ. Exhaled nitric oxide reflects  
310 asthma severity and asthma control. *Pediatr Crit Care Med* 2004;5:48-52.
- 311 39. Togias A. Rhinitis and asthma: evidence for respiratory system integration. *J Allergy Clin*  
312 *Immunol* 2003;111:1171-83; quiz 84.
- 313 40. Braunstahl GJ, Overbeek SE, Kleinjan A, Prins JB, Hoogsteden HC, Fokkens WJ. Nasal  
314 allergen provocation induces adhesion molecule expression and tissue eosinophilia in  
315 upper and lower airways. *J Allergy Clin Immunol* 2001;107:469-76.
- 316 41. Corren J, Adinoff AD, Irvin CG. Changes in bronchial responsiveness following nasal  
317 provocation with allergen. *J Allergy Clin Immunol* 1992;89:611-8.
- 318 42. Nolte D, Berger D. On vagal bronchoconstriction in asthmatic patients by nasal irritation.  
319 *Eur J Respir Dis Suppl* 1983;128 (Pt 1):110-5.
- 320 43. Littell NT, Carlisle CC, Millman RP, Braman SS. Changes in airway resistance following  
321 nasal provocation. *Am Rev Respir Dis* 1990;141:580-3.
- 322 44. Lohia S, Schlosser RJ, Soler ZM. Impact of intranasal corticosteroids on asthma  
323 outcomes in allergic rhinitis: a meta-analysis. *Allergy* 2013;68:569-79.
- 324 45. Corren J, Manning BE, Thompson SF, Hennessy S, Strom BL. Rhinitis therapy and the  
325 prevention of hospital care for asthma: a case-control study. *J Allergy Clin Immunol*  
326 2004;113:415-9.
- 327 46. National Asthma Education and Prevention Program, Expert Panel Report 3: Guidelines  
328 for the Diagnosis and Management of Asthma.

- 329 <http://www.nhlbi.nih.gov/guidelines/asthma/>: U.S. Department of Health and Human  
330 Services; 2007.
- 331 47. Global Strategy for Asthma Management and Prevention, Global Initiative for Asthma  
332 (GINA) 2015. . 2015. (Accessed October 10, 2015, 2015, at  
333 <http://www.ginasthma.org>.)
- 334 48. Covar RA, Spahn JD, Murphy JR, Szeffler SJ, Childhood Asthma Management Program  
335 Research G. Progression of asthma measured by lung function in the childhood asthma  
336 management program. *American journal of respiratory and critical care medicine*  
337 2004;170:234-41.
- 338 49. Horak E, Lanigan A, Roberts M, et al. Longitudinal study of childhood wheezy bronchitis  
339 and asthma: outcome at age 42. *BMJ* 2003;326:422-3.
- 340 50. Oswald H, Phelan PD, Lanigan A, et al. Childhood asthma and lung function in mid-adult  
341 life. *Pediatr Pulmonol* 1997;23:14-20.
- 342 51. Fuhlbrigge AL, Weiss ST, Kuntz KM, Paltiel AD, Group CR. Forced expiratory volume in  
343 1 second percentage improves the classification of severity among children with asthma.  
344 *Pediatrics* 2006;118:e347-55.
- 345 52. Weiss ST, Van Natta ML, Zeiger RS. Relationship between increased airway  
346 responsiveness and asthma severity in the childhood asthma management program.  
347 *American journal of respiratory and critical care medicine* 2000;162:50-6.
- 348 53. Wang Z, May SM, Charoenlap S, et al. Effects of secondhand smoke exposure on  
349 asthma morbidity and health care utilization in children: a systematic review and meta-  
350 analysis. *Ann Allergy Asthma Immunol* 2015;115:396-401 e2.
- 351 54. Comhair SA, Gaston BM, Ricci KS, et al. Detrimental effects of environmental tobacco  
352 smoke in relation to asthma severity. *PloS one* 2011;6:e18574.

- 353 55. Howrylak JA, Spanier AJ, Huang B, et al. Cotinine in children admitted for asthma and  
354 readmission. *Pediatrics* 2014;133:e355-62.
- 355 56. Laoudi Y, Nikasinovic L, Sahraoui F, Grimfeld A, Momas I, Just J. Passive smoking is a  
356 major determinant of exhaled nitric oxide levels in allergic asthmatic children. *Allergy*  
357 2010;65:491-7.
- 358 57. Yates DH, Breen H, Thomas PS. Passive smoke inhalation decreases exhaled nitric  
359 oxide in normal subjects. *American journal of respiratory and critical care medicine*  
360 2001;164:1043-6.
- 361 58. Kharitonov SA, Robbins RA, Yates D, Keatings V, Barnes PJ. Acute and chronic effects  
362 of cigarette smoking on exhaled nitric oxide. *American journal of respiratory and critical*  
363 *care medicine* 1995;152:609-12.
- 364 59. Halterman JS, Borrelli B, Tremblay P, et al. Screening for environmental tobacco smoke  
365 exposure among inner-city children with asthma. *Pediatrics* 2008;122:1277-83.
- 366 60. Kattan M, Mitchell H, Eggleston P, et al. Characteristics of inner-city children with  
367 asthma: the National Cooperative Inner-City Asthma Study. *Pediatr Pulmonol*  
368 1997;24:253-62.
- 369 61. Kumar R, Curtis LM, Khiani S, et al. A community-based study of tobacco smoke  
370 exposure among inner-city children with asthma in Chicago. *J Allergy Clin Immunol*  
371 2008;122:754-9 e1.
- 372 62. Matsui EC, Hansel NN, Aloe C, et al. Indoor pollutant exposures modify the effect of  
373 airborne endotoxin on asthma in urban children. *American journal of respiratory and*  
374 *critical care medicine* 2013;188:1210-5.
- 375 63. Goleva E, Searing DA, Jackson LP, Richers BN, Leung DY. Steroid requirements and  
376 immune associations with vitamin D are stronger in children than adults with asthma. *J*  
377 *Allergy Clin Immunol* 2012;129:1243-51.

- 378 64. Sutherland ER, Goleva E, Jackson LP, Stevens AD, Leung DY. Vitamin D levels, lung  
379 function, and steroid response in adult asthma. *American journal of respiratory and*  
380 *critical care medicine* 2010;181:699-704.
- 381 65. Wu AC, Tantisira K, Li L, et al. Effect of vitamin D and inhaled corticosteroid treatment  
382 on lung function in children. *American journal of respiratory and critical care medicine*  
383 2012;186:508-13.
- 384 66. Paul G, Brehm JM, Alcorn JF, Holguin F, Aujla SJ, Celedon JC. Vitamin D and asthma.  
385 *American journal of respiratory and critical care medicine* 2012;185:124-32.
- 386 67. Brehm JM, Schuemann B, Fuhlbrigge AL, et al. Serum vitamin D levels and severe  
387 asthma exacerbations in the Childhood Asthma Management Program study. *J Allergy*  
388 *Clin Immunol* 2010;126:52-8 e5.
- 389 68. Brehm JM, Acosta-Perez E, Klei L, et al. Vitamin D insufficiency and severe asthma  
390 exacerbations in Puerto Rican children. *American journal of respiratory and critical care*  
391 *medicine* 2012;186:140-6.
- 392 69. Brehm JM, Celedon JC, Soto-Quiros ME, et al. Serum vitamin D levels and markers of  
393 severity of childhood asthma in Costa Rica. *American journal of respiratory and critical*  
394 *care medicine* 2009;179:765-71.
- 395 70. Gergen PJ, Teach SJ, Mitchell HE, et al. Lack of a relation between serum 25-  
396 hydroxyvitamin D concentrations and asthma in adolescents. *Am J Clin Nutr*  
397 2013;97:1228-34.
- 398 71. Pojsupap S, Iliriani K, Sampaio TZ, et al. Efficacy of high-dose vitamin D in pediatric  
399 asthma: a systematic review and meta-analysis. *The Journal of asthma : official journal*  
400 *of the Association for the Care of Asthma* 2015;52:382-90.
- 401 72. Freishtat RJ, Iqbal SF, Pillai DK, et al. High prevalence of vitamin D deficiency among  
402 inner-city African American youth with asthma in Washington, DC. *J Pediatr*  
403 2010;156:948-52.

- 404 73. Wright RJ, Mitchell H, Visness CM, et al. Community violence and asthma morbidity: the  
405 Inner-City Asthma Study. *Am J Public Health* 2004;94:625-32.
- 406 74. Wright RJ, Steinbach SF. Violence: an unrecognized environmental exposure that may  
407 contribute to greater asthma morbidity in high risk inner-city populations. *Environmental*  
408 *health perspectives* 2001;109:1085-9.
- 409 75. Sandberg S, Jarvenpaa S, Penttinen A, Paton JY, McCann DC. Asthma exacerbations  
410 in children immediately following stressful life events: a Cox's hierarchical regression.  
411 *Thorax* 2004;59:1046-51.
- 412 76. Sandberg S, Paton JY, Ahola S, et al. The role of acute and chronic stress in asthma  
413 attacks in children. *Lancet* 2000;356:982-7.
- 414 77. Chen E, Hanson MD, Paterson LQ, Griffin MJ, Walker HA, Miller GE. Socioeconomic  
415 status and inflammatory processes in childhood asthma: the role of psychological stress.  
416 *J Allergy Clin Immunol* 2006;117:1014-20.
- 417 78. Chen E, Strunk RC, Bacharier LB, Chan M, Miller GE. Socioeconomic status associated  
418 with exhaled nitric oxide responses to acute stress in children with asthma. *Brain Behav*  
419 *Immun* 2010;24:444-50.
- 420 79. Liu LY, Coe CL, Swenson CA, Kelly EA, Kita H, Busse WW. School examinations  
421 enhance airway inflammation to antigen challenge. *American journal of respiratory and*  
422 *critical care medicine* 2002;165:1062-7.
- 423 80. Ritz T, Ayala ES, Trueba AF, Vance CD, Auchus RJ. Acute stress-induced increases in  
424 exhaled nitric oxide in asthma and their association with endogenous cortisol. *American*  
425 *journal of respiratory and critical care medicine* 2011;183:26-30.
- 426 81. Ritz T, Trueba AF, Simon E, Auchus RJ. Increases in exhaled nitric oxide after acute  
427 stress: association with measures of negative affect and depressive mood. *Psychosom*  
428 *Med* 2014;76:716-25.

- 429 82. Tal A, Miklich DR. Emotionally induced decreases in pulmonary flow rates in asthmatic  
430 children. *Psychosom Med* 1976;38:190-200.
- 431 83. Ritz T, Kullowatz A, Goldman MD, et al. Airway response to emotional stimuli in asthma:  
432 the role of the cholinergic pathway. *Journal of applied physiology* 2010;108:1542-9.
- 433 84. McQuaid EL, Fritz GK, Nassau JH, Lilly MK, Mansell A, Klein RB. Stress and airway  
434 resistance in children with asthma. *J Psychosom Res* 2000;49:239-45.
- 435 85. Kattan M, Kumar R, Bloomberg GR, et al. Asthma control, adiposity, and adipokines  
436 among inner-city adolescents. *J Allergy Clin Immunol* 2010;125:584-92.
- 437 86. Black MH, Zhou H, Takayanagi M, Jacobsen SJ, Koebnick C. Increased asthma risk and  
438 asthma-related health care complications associated with childhood obesity. *Am J*  
439 *Epidemiol* 2013;178:1120-8.
- 440 87. Boulet LP, Franssen E. Influence of obesity on response to fluticasone with or without  
441 salmeterol in moderate asthma. *Respir Med* 2007;101:2240-7.
- 442 88. Peters-Golden M, Swern A, Bird SS, Hustad CM, Grant E, Edelman JM. Influence of  
443 body mass index on the response to asthma controller agents. *Eur Respir J*  
444 2006;27:495-503.
- 445 89. Strunk RC, Colvin R, Bacharier LB, et al. Airway Obstruction Worsens in Young Adults  
446 with Asthma Who Become Obese. *J Allergy Clin Immunol Pract* 2015;3:765-71 e2.
- 447 90. Pakhale S, Baron J, Dent R, Vandemheen K, Aaron SD. Effects of weight loss on airway  
448 responsiveness in obese adults with asthma: does weight loss lead to reversibility of  
449 asthma? *Chest* 2015;147:1582-90.
- 450 91. McGarry ME, Castellanos E, Thakur N, et al. Obesity and bronchodilator response in  
451 black and Hispanic children and adolescents with asthma. *Chest* 2015;147:1591-8.
- 452 92. Kumanyika SK. Obesity in minority populations: an epidemiologic assessment. *Obes*  
453 *Res* 1994;2:166-82.

454 93. Pongracic JA, Krouse RZ, Babineau DC, et al. Asthma Phenotypes in the Inner City:  
 455 Distinguishing Characteristics of Difficult-to-Control Asthma in Children. J Aller Clin  
 456 Immunol Submitted simultaneously.

457 **TABLE E1.** Characterization of study participants by demographics and observed variables in  
 458 each domain. Summary statistics include mean (standard deviation) <minimum; maximum> for  
 459 normally distributed continuous variables, median [25<sup>th</sup> percentile; 75<sup>th</sup> percentile] <minimum;  
 460 maximum> for non-normally distributed continuous variables and frequency (percentage) for  
 461 categorical variables.  
 462

| Characteristic                                   | Summary Measure                       | N   |
|--------------------------------------------------|---------------------------------------|-----|
| <b>Demographics</b>                              |                                       |     |
| Male                                             | 324 (57.75%)                          | 561 |
| Race <sup>1</sup> :                              |                                       | 561 |
| Black (non-Hispanic)                             | 361 (64.35%)                          |     |
| Hispanic                                         | 160 (28.52%)                          |     |
| Other/Mixed                                      | 31 (5.53%)                            |     |
| White (non-Hispanic)                             | 9 (1.60%)                             |     |
| Age at Screening (years)                         | 10.80 (3.02)<br><6.00;17.00>          | 561 |
| Income<\$15,000 <sup>2</sup>                     | 308 (55.10%)                          | 559 |
| <b>Obesity</b>                                   |                                       |     |
| BMI z-score at Screening                         | 0.98 (1.18)<br><-4.18;3.01>           | 561 |
| BMI percentile at Screening <sup>2</sup>         | 85.84 (55.67, 97.66)<br><0.00, 99.87> | 561 |
| <b>Vitamin D</b>                                 |                                       |     |
| Total 25-hydroxyvitamin D at V0 (ng/mL)          | 19.31 (7.39)<br><2.50;50.29>          | 561 |
| <b>Environmental tobacco smoke exposure</b>      |                                       |     |
| Number of smokers in the home at Screening:      |                                       | 561 |
| 0                                                | 329 (58.65%)                          |     |
| 1                                                | 171 (30.48%)                          |     |
| >1                                               | 61 (10.87%)                           |     |
| Urine cotinine at Screening (ng/mL) <sup>3</sup> |                                       | 553 |
| 0 = 0-10                                         | 92 (16.64%)                           |     |
| 1 = 10-30                                        | 325 (58.77%)                          |     |
| 2 = 30-100                                       | 89 (16.09%)                           |     |
| 3 = 100-200                                      | 16 (2.89%)                            |     |
| 4 = 200-500                                      | 18 (3.25%)                            |     |
| 5 = 500-1000                                     | 7 (1.27%)                             |     |
| 6 = >1000                                        | 6 (1.08%)                             |     |
| <b>Stress</b>                                    |                                       |     |

| <b>Characteristic</b>                                                     | <b>Summary Measure</b>                    | <b>N</b> |
|---------------------------------------------------------------------------|-------------------------------------------|----------|
| Caretaker Perceived Stress Scale at V0                                    | 14.93 (7.49)<br><0.00;36.00>              | 561      |
| <b>Rhinitis severity</b>                                                  |                                           |          |
| Mean of rhinitis medication score <sup>4</sup> between V0 and V6          | 10.33 (4.82)<br><0.00;15.00>              | 561      |
| Variance of rhinitis medication score <sup>4</sup> between V0 and V6      | 14.68 (15.22)<br><0.00;64.29>             | 561      |
| Mean of rhinitis symptom score <sup>5</sup> between V0 and V6             | 6.45 (3.75)<br><0.00;19.86>               | 561      |
| Variance of rhinitis symptom score <sup>5</sup> between V0 and V6         | 17.91 (15.63)<br><0.00;113.30>            | 561      |
| <b>Allergic inflammation</b>                                              |                                           |          |
| Blood eosinophil count at V0 (cells/mm3) <sup>6</sup>                     | 300.00 [177.75, 500.00]<br><0.00;1700.00> | 556      |
| FeNO at V0 (ppb) <sup>6</sup>                                             | 19.50 [11.85;37.48]<br><2.50;162.48>      | 520      |
| FeNO at V6 (ppb) <sup>6</sup>                                             | 24.00 [13.00;45.00]<br><3.15;300.00>      | 519      |
| <b>Pulmonary physiology</b>                                               |                                           |          |
| Bronchodilator response at V6                                             | 10.26 (11.48)<br><-32.40;86.40>           | 518      |
| Mean of FEV <sub>1</sub> (% predicted) between V0 and V6                  | 93.68 (14.37)<br><56.03;145.90>           | 561      |
| Variance of FEV <sub>1</sub> (% predicted) between V0 and V6              | 83.24 (97.97)<br><1.28;668.86>            | 561      |
| Mean of FEV <sub>1</sub> /FVC (x100) between V0 and V6                    | 79.26 (8.10)<br><49.63;96.31>             | 560      |
| Variance of FEV <sub>1</sub> /FVC (x100) between V0 and V6                | 24.97 (32.32)<br><0.44;335.56>            | 559      |
| <b>Allergen sensitization</b>                                             |                                           |          |
| Total serum IgE at V0 (kU/L) <sup>6</sup>                                 | 291.00 [92.0;840.00]<br><1.00;5001.00>    | 557      |
| Number of allergen sensitizations <sup>7</sup> (panel of 22) at Screening | 9.01 (6.24)<br><0.00;21.00>               | 561      |
| Sensitized to molds <sup>8</sup> at V0                                    | 292 (52.05%)                              | 561      |
| Sensitized to dust mites <sup>9</sup> at V0                               | 337 (60.1%)                               | 561      |
| Sensitized to roaches <sup>10</sup> at V0                                 | 323 (57.6%)                               | 561      |
| Sensitized to rodents <sup>11</sup> at V0                                 | 241 (43.0%)                               | 561      |
| Sensitized to pets <sup>12</sup> at V0                                    | 371 (66.1%)                               | 561      |
| Sensitized to pollen/peanut <sup>13</sup> at V0                           | 406 (72.4%)                               | 561      |
| Sensitized to foods <sup>14</sup> at V0                                   | 172 (30.8%)                               | 558      |
| <b>Asthma severity</b>                                                    |                                           |          |

| Characteristic                                                                              | Summary Measure             | N   |
|---------------------------------------------------------------------------------------------|-----------------------------|-----|
| ACT/cACT <sup>15</sup> at V6:                                                               |                             | 535 |
| Well Controlled                                                                             | 434 (81.1%)                 |     |
| Not Well Controlled                                                                         | 91 (17.0%)                  |     |
| Very Poorly Controlled                                                                      | 10 (1.87%)                  |     |
| Mean of controller treatment step between V0 and V6                                         | 3.14 (1.93)<br><0.00;6.00>  | 561 |
| Variance of controller treatment step between V0 and V6                                     | 0.96 (0.89)<br><0.00;5.24>  | 561 |
| Mean of CASI component - Day symptoms & albuterol use <sup>16</sup> between V0 and V6       | 0.30 (0.35)<br><0.00;2.00>  | 561 |
| Variance of CASI component - Day symptoms & albuterol use <sup>16</sup> between V0 and V6   | 0.41 (0.56)<br><0.00;2.57>  | 561 |
| Mean of CASI component - Night symptoms & albuterol use <sup>17</sup> between V0 and V6     | 0.27 (0.39)<br><0.00;2.00>  | 561 |
| Variance of CASI component - Night symptoms & albuterol use <sup>17</sup> between V0 and V6 | 0.42 (0.61)<br><0.00;2.70>  | 561 |
| Mean of CASI component - Exacerbations <sup>18</sup> between V0 and V6                      | 0.30 (0.50)<br><0.00;4.00>  | 561 |
| Variance of CASI component - Exacerbations <sup>18</sup> between V0 and V6                  | 0.76 (1.44)<br><0.00;10.29> | 561 |

- 463 1. Race is dichotomous (black vs. other) in the structural equation model.  
464 2. Not included in the structural equation model.  
465 3. Analyzed as a continuous variable in the structural equation model.  
466 4. Rhinitis medication score is set to 0 for no medications, 5 for antihistamines only, 10 for nasal steroids only, and  
467 15 for antihistamines and nasal steroids.  
468 5. Rhinitis symptom score is based on the Modified Rhinitis Symptom Utility Index.<sup>93</sup>  
469 6. Variable is log10 transformed in the structural equation model.  
470 7. Sensitization is based on a positive skin prick test and/or positive specific IgE to at least one of the following  
471 allergens: *Alternaria tenuis* (skin prick test) or *Alternaria alternata* (specific IgE), *Aspergillus fumigatus* (both skin  
472 prick test and specific IgE), *Cladosporium herbarum* (specific IgE only), *Dermatophagoides farinae*,  
473 *Dermatophagoides pteronyssinus*, German cockroach, American cockroach, mouse, rat, cat, dog, oak, pecan,  
474 birch, maple, Eastern 8 tree mix, ragweed mix (giant/short; skin prick test) or short ragweed (specific Ige),  
475 timothy grass, Kentucky Blue/June, Orchard and Timothy (K-O-T) grass mix, peanut, egg and milk.  
476 8. Sensitization is based on a positive prick skin test and/or positive specific IgE to at least one of the following  
477 allergens: *Alternaria tenuis* (skin prick test) or *Alternaria alternata* (specific IgE), *Aspergillus fumigatus*, and  
478 *Cladosporium herbarum*.  
479 9. Sensitization is based on a positive skin prick test and/or positive specific IgE to at least one of the following  
480 allergens: *Dermatophagoides farinae* and *Dermatophagoides pteronyssinus*.  
481 10. Sensitization is based on a positive skin prick test and/or positive specific IgE to at least one of the following  
482 allergens: German cockroach and American cockroach.  
483 11. Sensitization is based on a positive skin prick test and/or positive specific IgE to at least one of the following  
484 allergens: mouse and rat.  
485 12. Sensitization is based on a positive skin prick test and/or positive specific IgE to at least one of the following  
486 allergens: cat and dog.  
487 13. Sensitization is based on a positive skin prick test and/or positive specific IgE to at least one of the following  
488 allergens: oak, pecan, birch, maple, Eastern 8 tree mix, ragweed, timothy grass, Kentucky Blue/June, Orchard  
489 and Timothy (K-O-T) grass mix, and peanut.  
490 14. Sensitization is based on a positive skin prick test and/or positive specific IgE to at least one of the following  
491 allergens: egg and milk.  
492 15. ACT is categorized as very poorly controlled ( $\leq 15$ ), not well controlled ( $\geq 16$  &  $\leq 19$ ), and well controlled ( $\geq 20$ ).  
493 cACT is categorized as very poorly controlled ( $\leq 12$ ), not well controlled ( $\geq 13$  &  $\leq 19$ ), and well controlled ( $\geq 20$ ).

- 494 16. Composite Asthma Severity Index (CASI) component – Day symptoms includes measures of day asthma  
 495 symptoms and albuterol use in the last 2 weeks (scoring range between 0 and 3).  
 496 17. CASI component – Night symptoms includes measures of night asthma symptoms and albuterol use in the last 2  
 497 weeks (scoring range between 0 and 3).  
 498 18. CASI component – Exacerbations includes hospitalizations and/or oral corticosteroid bursts in the last 2 months.  
 499

500 **TABLE E2.** Effect of age, sex and race on each domain. The direct effect of age is the adjusted  
 501 standard deviation (SD) ( $\pm$  standard error (SE)) increase in each domain for every one SD  
 502 increase in age while the direct effect of sex or race is the adjusted standard deviation (SD) ( $\pm$   
 503 standard error (SE)) increase in each domain comparing males to females or black and non-  
 504 black respectively.  
 505

| Domain                 | Standardized Direct Effect of Age                                                       | Standardized Direct Effect of Sex                                                       | Standardized Direct Effect of Race |
|------------------------|-----------------------------------------------------------------------------------------|-----------------------------------------------------------------------------------------|------------------------------------|
| Allergen Sensitization | 0.097 $\pm$ 0.045<br>(p=0.033)                                                          | 0.136 $\pm$ 0.045<br>(p=0.002)                                                          | 0.077 $\pm$ 0.045<br>(p=0.085)     |
| Allergic Inflammation  | 0.187 $\pm$ 0.059<br>(p=0.002)                                                          | 0.136 $\pm$ 0.051<br>(p=0.008)                                                          | -0.089 $\pm$ 0.055<br>(p=0.106)    |
| Pulmonary Physiology   | -0.261 $\pm$ 0.060<br>(p<0.001)                                                         | -0.005 $\pm$ 0.056<br>(p=0.933)                                                         | 0.128 $\pm$ 0.057<br>(p=0.025)     |
| ETS Exposure           | 0.222 $\pm$ 0.067<br>(p=0.001)                                                          | -0.121 $\pm$ 0.068<br>(p=0.075)                                                         | 0.205 $\pm$ 0.070<br>(p=0.003)     |
| Vitamin D              | -0.286 $\pm$ 0.036<br>(p<0.001)                                                         | 0.163 $\pm$ 0.040<br>(p<0.001)                                                          | -0.16 $\pm$ 0.039<br>(p<0.001)     |
| Stress                 | -0.033 $\pm$ 0.043<br>(p=0.435)                                                         | -0.002 $\pm$ 0.042<br>(p=0.96)                                                          | -0.002 $\pm$ 0.044<br>(p=0.96)     |
| Obesity                | BMI z-score<br>adjusts for<br>age and sex<br>already so<br>association<br>not included. | BMI z-score<br>adjusts for<br>age and sex<br>already so<br>association<br>not included. | 0.023 $\pm$ 0.043<br>(p=0.588)     |
| Rhinitis Severity      | -0.018 $\pm$ 0.053<br>(p=0.74)                                                          | -0.171 $\pm$ 0.052<br>(p=0.001)                                                         | 0.144 $\pm$ 0.049<br>(p=0.003)     |
| Asthma Severity        | -0.043 $\pm$ 0.06<br>(p=0.472)                                                          | -0.036 $\pm$ 0.05<br>(p=0.477)                                                          | -0.108 $\pm$ 0.052<br>(p=0.039)    |

506  
 507  
 508  
 509

510 **TABLE E3.** Indirect effects of Allergen Sensitization on Asthma Severity. Estimates ( $\pm$  standard  
 511 error) are interpreted as the standard deviation (SD) increase in Asthma Severity for every one  
 512 SD increase in Allergen Sensitization, via the intermediate or intermediate pathway. All  
 513 estimates are adjusted for age, sex and race.  
 514

| Independent Domain     | Intermediate or Intermediate Pathway                                   | Standardized Indirect Effect | Standardized Total Indirect Effect |
|------------------------|------------------------------------------------------------------------|------------------------------|------------------------------------|
| Allergen Sensitization | Allergic Inflammation                                                  | -0.16 $\pm$ 0.06<br>(p=0.01) | 0.18 $\pm$ 0.05<br>(p<0.001)       |
|                        | Allergic Inflammation<br>→ Pulmonary Physiology                        | 0.19 $\pm$ 0.04<br>(p<0.001) |                                    |
|                        | Allergic Inflammation<br>→ Rhinitis Severity                           | 0.16 $\pm$ 0.03<br>(p<0.001) |                                    |
|                        | Allergic Inflammation<br>→ Rhinitis Severity<br>→ Pulmonary Physiology | -0.01 $\pm$ 0.01<br>(p=0.35) |                                    |

515  
 516

517  
518  
519  
520  
521  
522  
523

**TABLE E4.** Mediated effects of domains on Asthma Severity. The direct effect is the adjusted standard deviation (SD) ( $\pm$  standard error (SE)) increase in Asthma Severity for every one SD increase in the independent domain. The indirect effect is the SD ( $\pm$  SE) increase in Asthma Severity for every one SD increase in independent domain, via the mediator or mediating pathway. The total effect is the SD ( $\pm$  SE) increase in Asthma Severity for every one SD increase in the independent domain. All estimates are adjusted for age, sex and race.

| Independent Domain          | Mediator or Mediating Pathway                                          | Standardized Direct Effect   | Standardized Indirect Effect   | Standardized Total Effect    | Evidence of Mediation |
|-----------------------------|------------------------------------------------------------------------|------------------------------|--------------------------------|------------------------------|-----------------------|
| Allergic Inflammation       | Pulmonary Physiology                                                   | -0.20 $\pm$ 0.08<br>(p=0.01) | 0.24 $\pm$ 0.05<br>(p<0.001)   | 0.22 $\pm$ 0.06<br>(p<0.001) | Yes                   |
|                             | Rhinitis Severity                                                      |                              | 0.20 $\pm$ 0.04<br>(p<0.001)   |                              | Yes                   |
|                             | Rhinitis Severity<br>→ Pulmonary Physiology                            |                              | -0.01 $\pm$ 0.01<br>(p=0.35)   |                              | No                    |
| Environmental Tobacco Smoke | Allergic Inflammation                                                  | 0.17 $\pm$ 0.08<br>(p=0.03)  | 0.02 $\pm$ 0.02<br>(p=0.41)    | 0.30 $\pm$ 0.08<br>(p<0.001) | No                    |
|                             | Pulmonary Physiology                                                   |                              | 0.14 $\pm$ 0.04<br>(p<0.001)   |                              | Yes                   |
|                             | Allergic Inflammation<br>→ Pulmonary Physiology                        |                              | -0.02 $\pm$ 0.02<br>(p=0.40)   |                              | No                    |
|                             | Allergic Inflammation<br>→ Rhinitis Severity                           |                              | -0.02 $\pm$ 0.02<br>(p=0.40)   |                              | No                    |
|                             | Allergic Inflammation<br>→ Rhinitis Severity<br>→ Pulmonary Physiology |                              | 0.001 $\pm$ 0.002<br>(p=0.51)  |                              | No                    |
| Vitamin D                   | Allergic Inflammation                                                  | 0.01 $\pm$ 0.05<br>(p=0.82)  | 0.03 $\pm$ 0.02<br>(p=0.08)    | 0.01 $\pm$ 0.05<br>(p=0.89)  | No                    |
|                             | Pulmonary Physiology                                                   |                              | 0.03 $\pm$ 0.02<br>(p=0.24)    |                              | No                    |
|                             | Allergic Inflammation<br>→ Pulmonary Physiology                        |                              | -0.04 $\pm$ 0.02<br>(p=0.03)   |                              | No                    |
|                             | Allergic Inflammation<br>→ Rhinitis Severity                           |                              | -0.03 $\pm$ 0.01<br>(p=0.04)   |                              | No                    |
|                             | Allergic Inflammation<br>→ Rhinitis Severity<br>→ Pulmonary Physiology |                              | 0.002 $\pm$ 0.002<br>(p=0.39)  |                              | No                    |
| Stress                      | Allergic Inflammation                                                  | 0.06 $\pm$ 0.05<br>(p=0.22)  | -0.01 $\pm$ 0.01<br>(p=0.24)   | 0.08 $\pm$ 0.05<br>(p=0.12)  | No                    |
|                             | Pulmonary Physiology                                                   |                              | 0.003 $\pm$ 0.03<br>(p=0.90)   |                              | No                    |
|                             | Allergic Inflammation<br>→ Pulmonary Physiology                        |                              | 0.02 $\pm$ 0.01<br>(p=0.21)    |                              | No                    |
|                             | Allergic Inflammation<br>→ Rhinitis Severity                           |                              | 0.01 $\pm$ 0.01<br>(p=0.20)    |                              | No                    |
|                             | Allergic Inflammation<br>→ Rhinitis Severity<br>→ Pulmonary Physiology |                              | -0.001 $\pm$ 0.001<br>(p=0.44) |                              | No                    |
| Obesity                     | Pulmonary Physiology                                                   | 0.06 $\pm$ 0.04<br>(p=0.11)  | -0.01 $\pm$ 0.02<br>(p=0.76)   | 0.06 $\pm$ 0.04<br>(p=0.18)  | No                    |
| Rhinitis Severity           | Pulmonary Physiology                                                   | 0.52 $\pm$ 0.06<br>(p<0.001) | -0.03 $\pm$ 0.04<br>(p=0.34)   | 0.48 $\pm$ 0.06<br>(p<0.001) | No                    |

524  
525

526 **TABLE E5.** Frequency and percentage of groups based on urine cotinine at Screening  
 527 stratified by number of smokers in the home (p<0.001 based on Pearson chi-squared test).  
 528

| Number of smokers<br>in the home | Urine cotinine at Screening (ng/mL) |             |            | Total |
|----------------------------------|-------------------------------------|-------------|------------|-------|
|                                  | 0-10                                | 10-30       | >30        |       |
| 0                                | 65 (20.1%)                          | 214 (66.0%) | 45 (13.9%) | 324   |
| 1                                | 22 (13.1%)                          | 86 (51.2%)  | 60 (35.7%) | 168   |
| ≥1                               | 5 (8.2%)                            | 25 (41.0%)  | 31 (50.8%) | 61    |
| Total                            | 92                                  | 325         | 136        | 553   |

529
