# Supplementary material
Source: PubMed Central journal article supplement (PMC5381517)

# A. Standardized effect of Asthma Severity on observed variables.

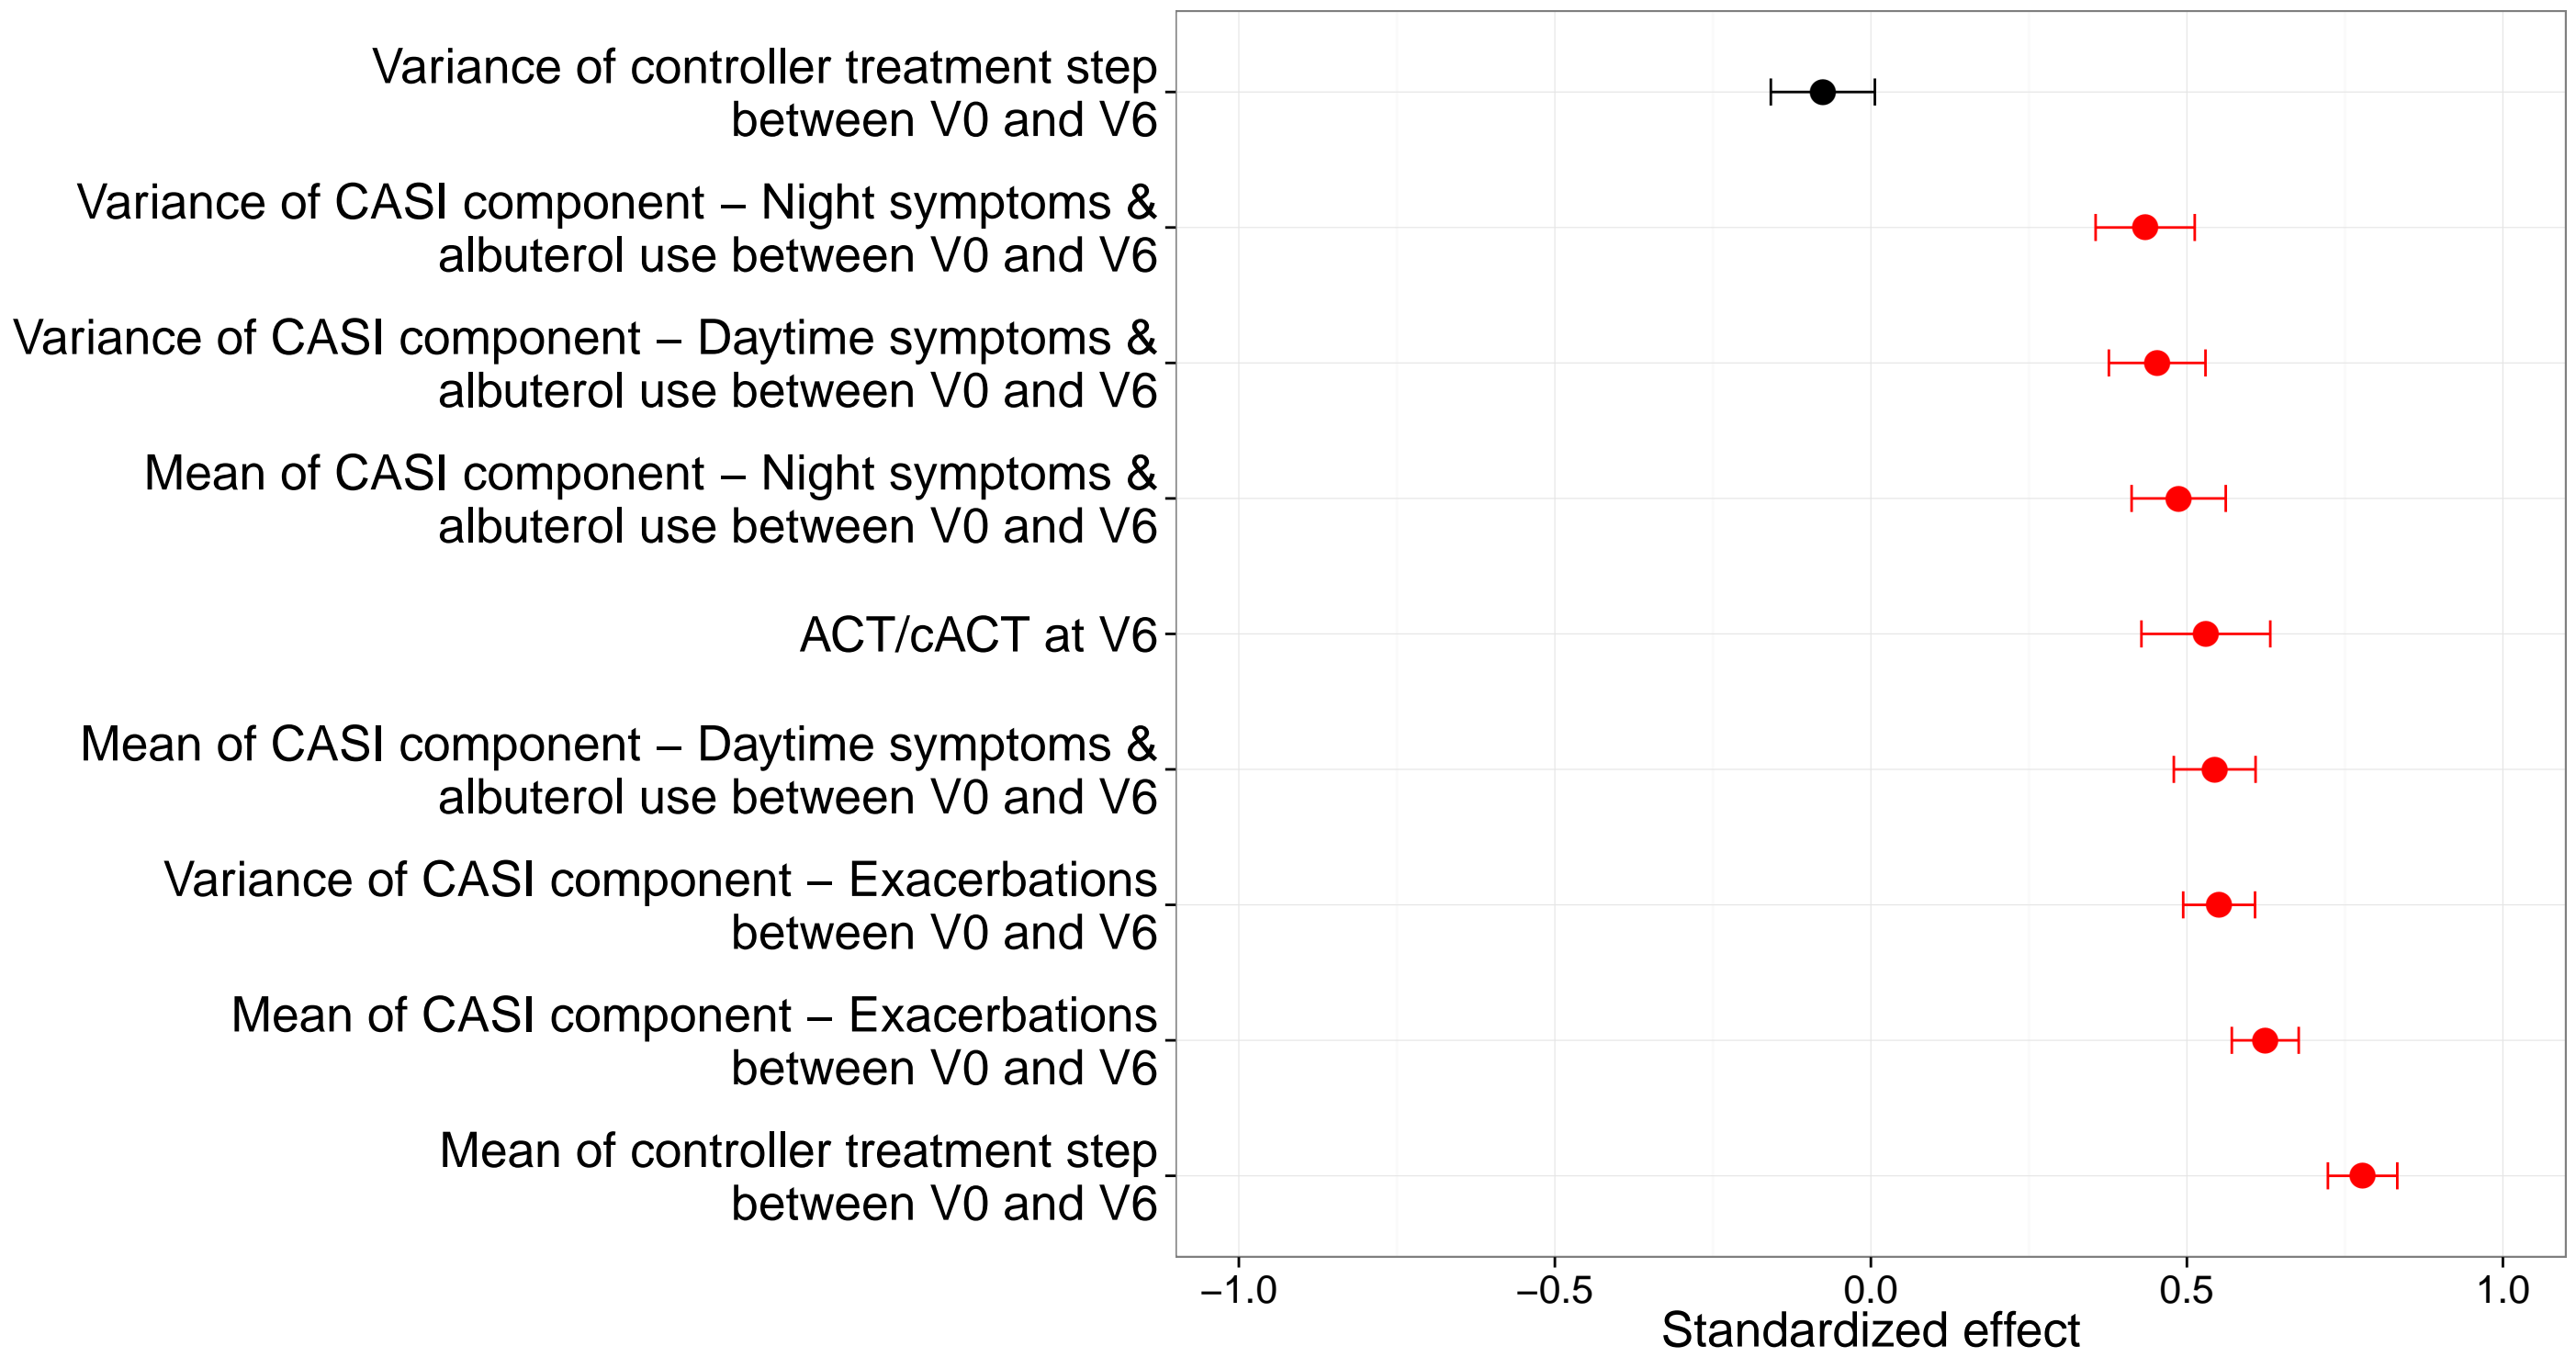

Supplement: NIHMS814026-supplement-1.pdf [file NIHMS814026-supplement-1.pdf]

## B. Standardized effect of Allergen Sensitization on observed variables.

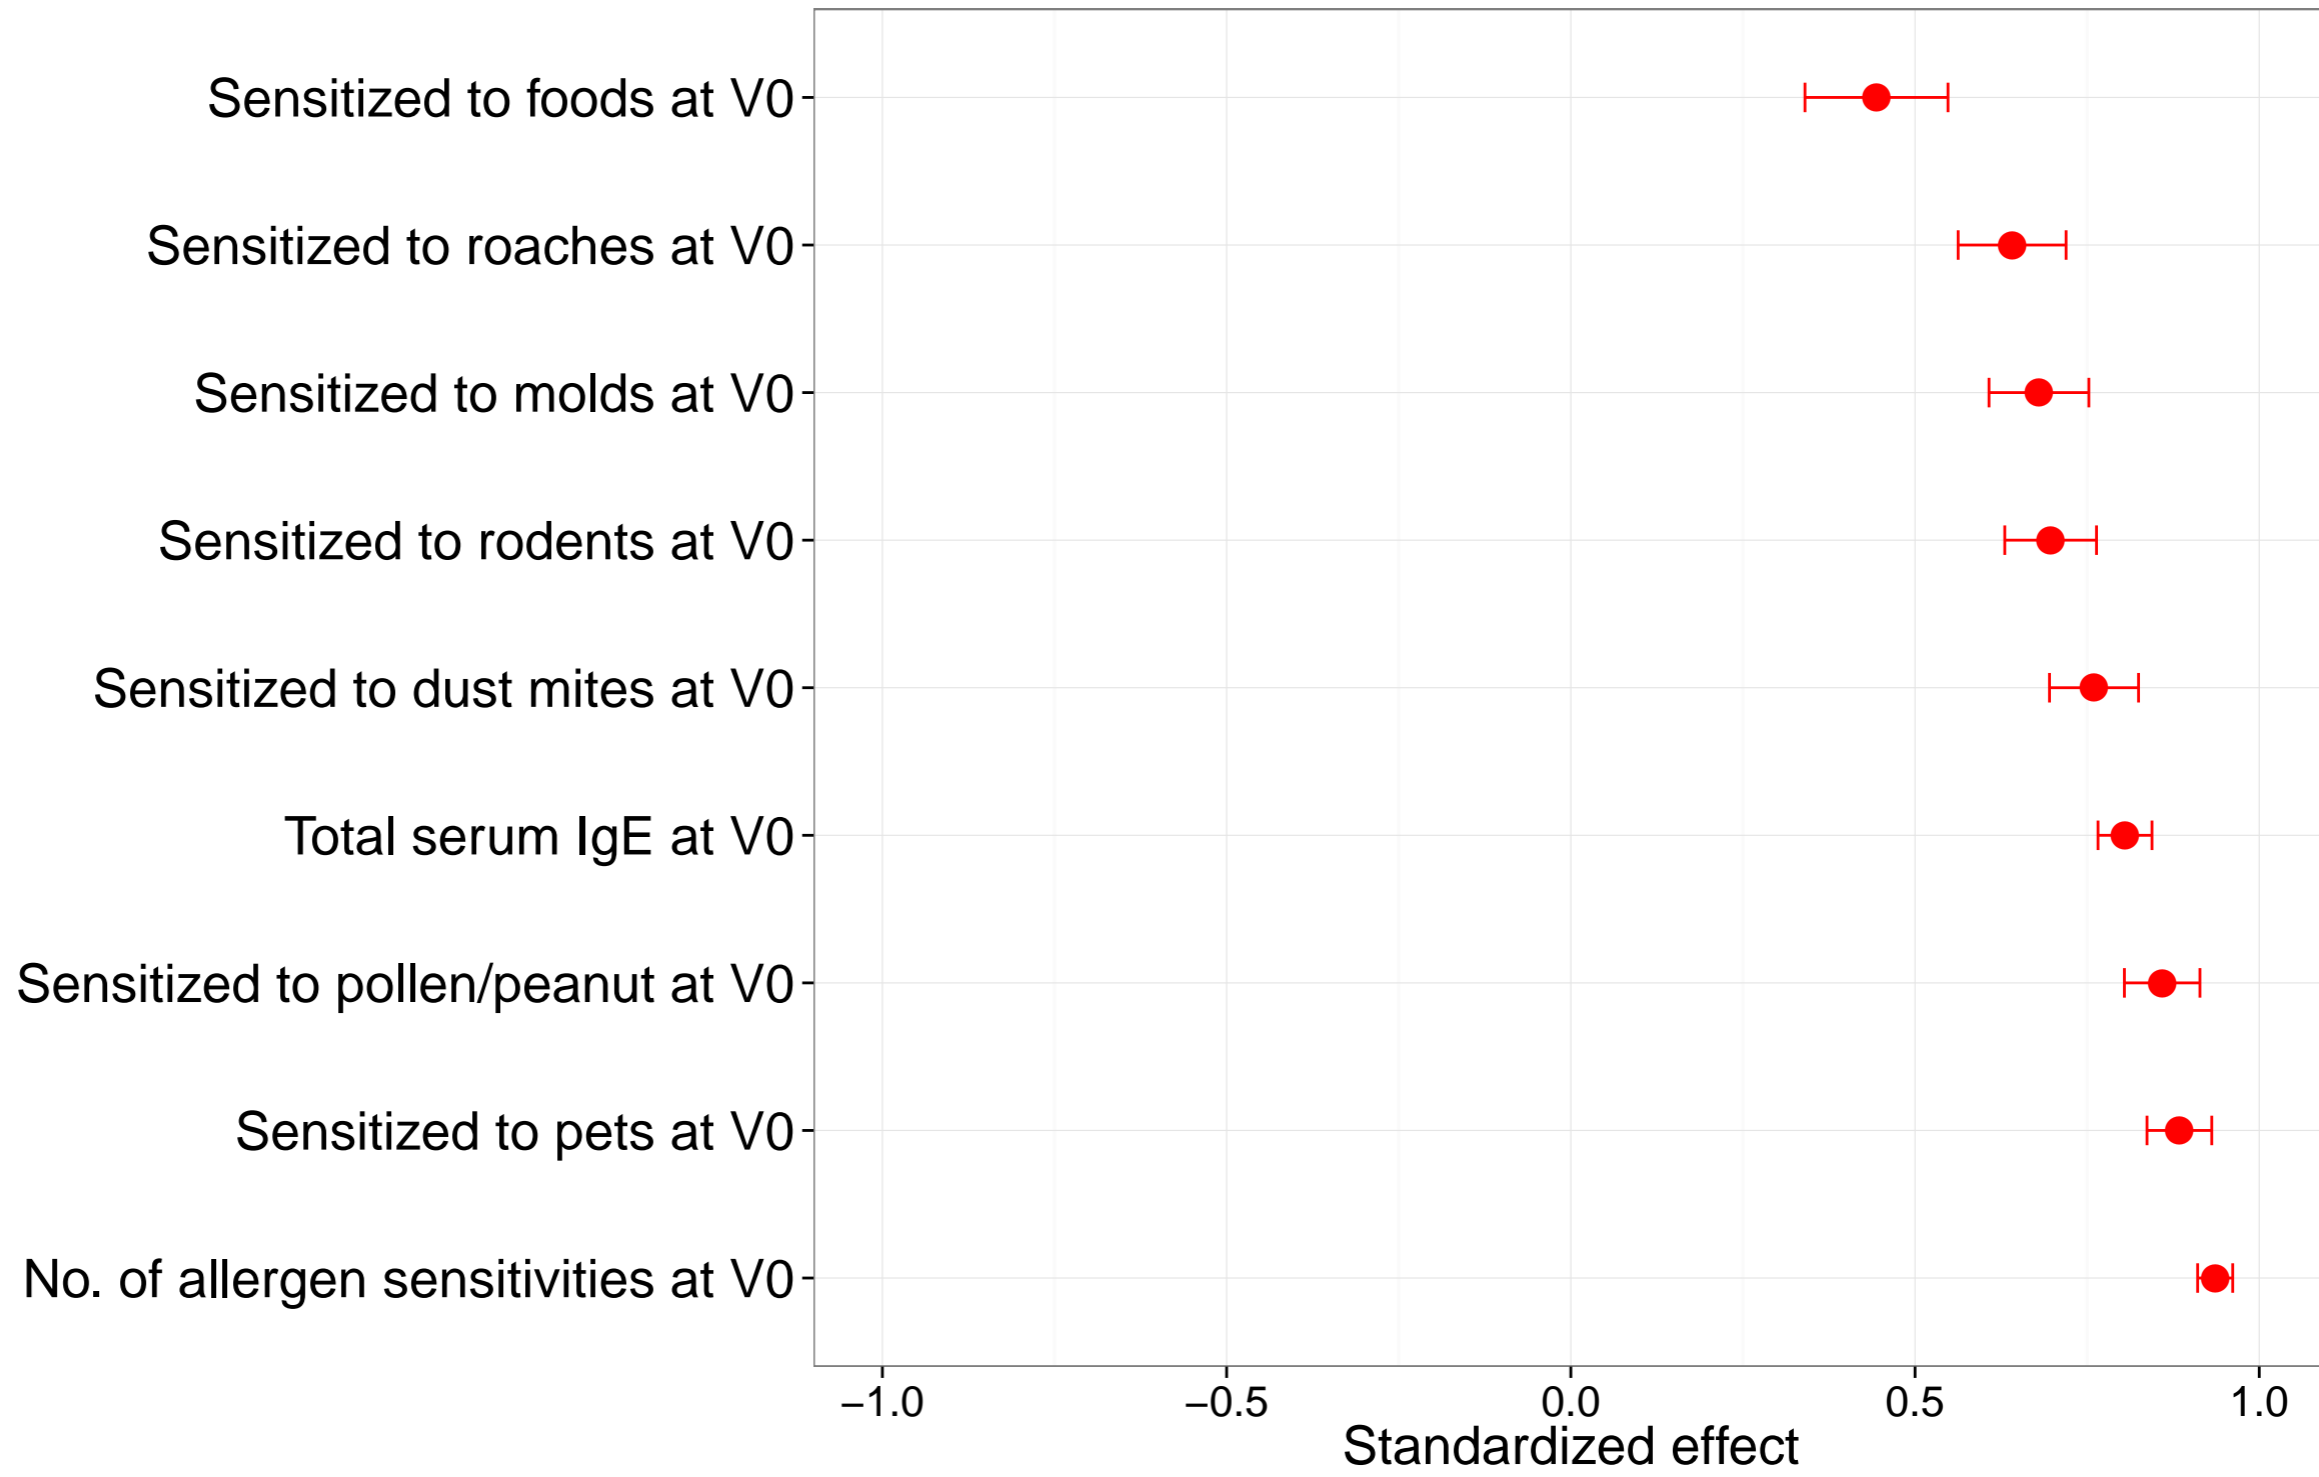

Supplement: NIHMS814026-supplement-2.pdf [file NIHMS814026-supplement-2.pdf]

## C. Standardized effect of Allergic Inflammation on observed variables.

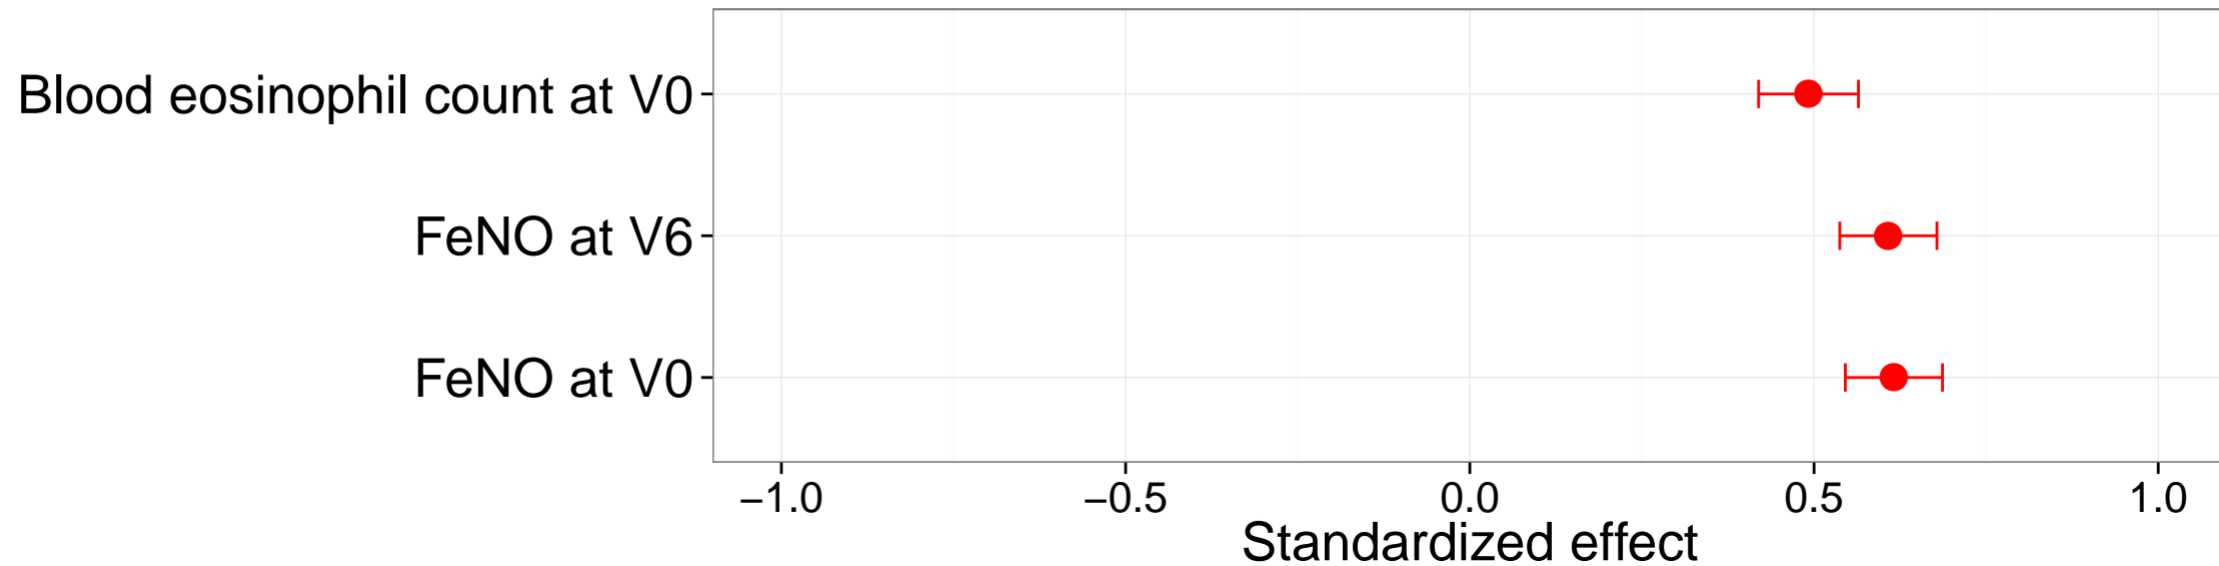

Supplement: NIHMS814026-supplement-3.pdf [file NIHMS814026-supplement-3.pdf]

## D. Standardized effect of Pulmonary Physiology on observed variables.

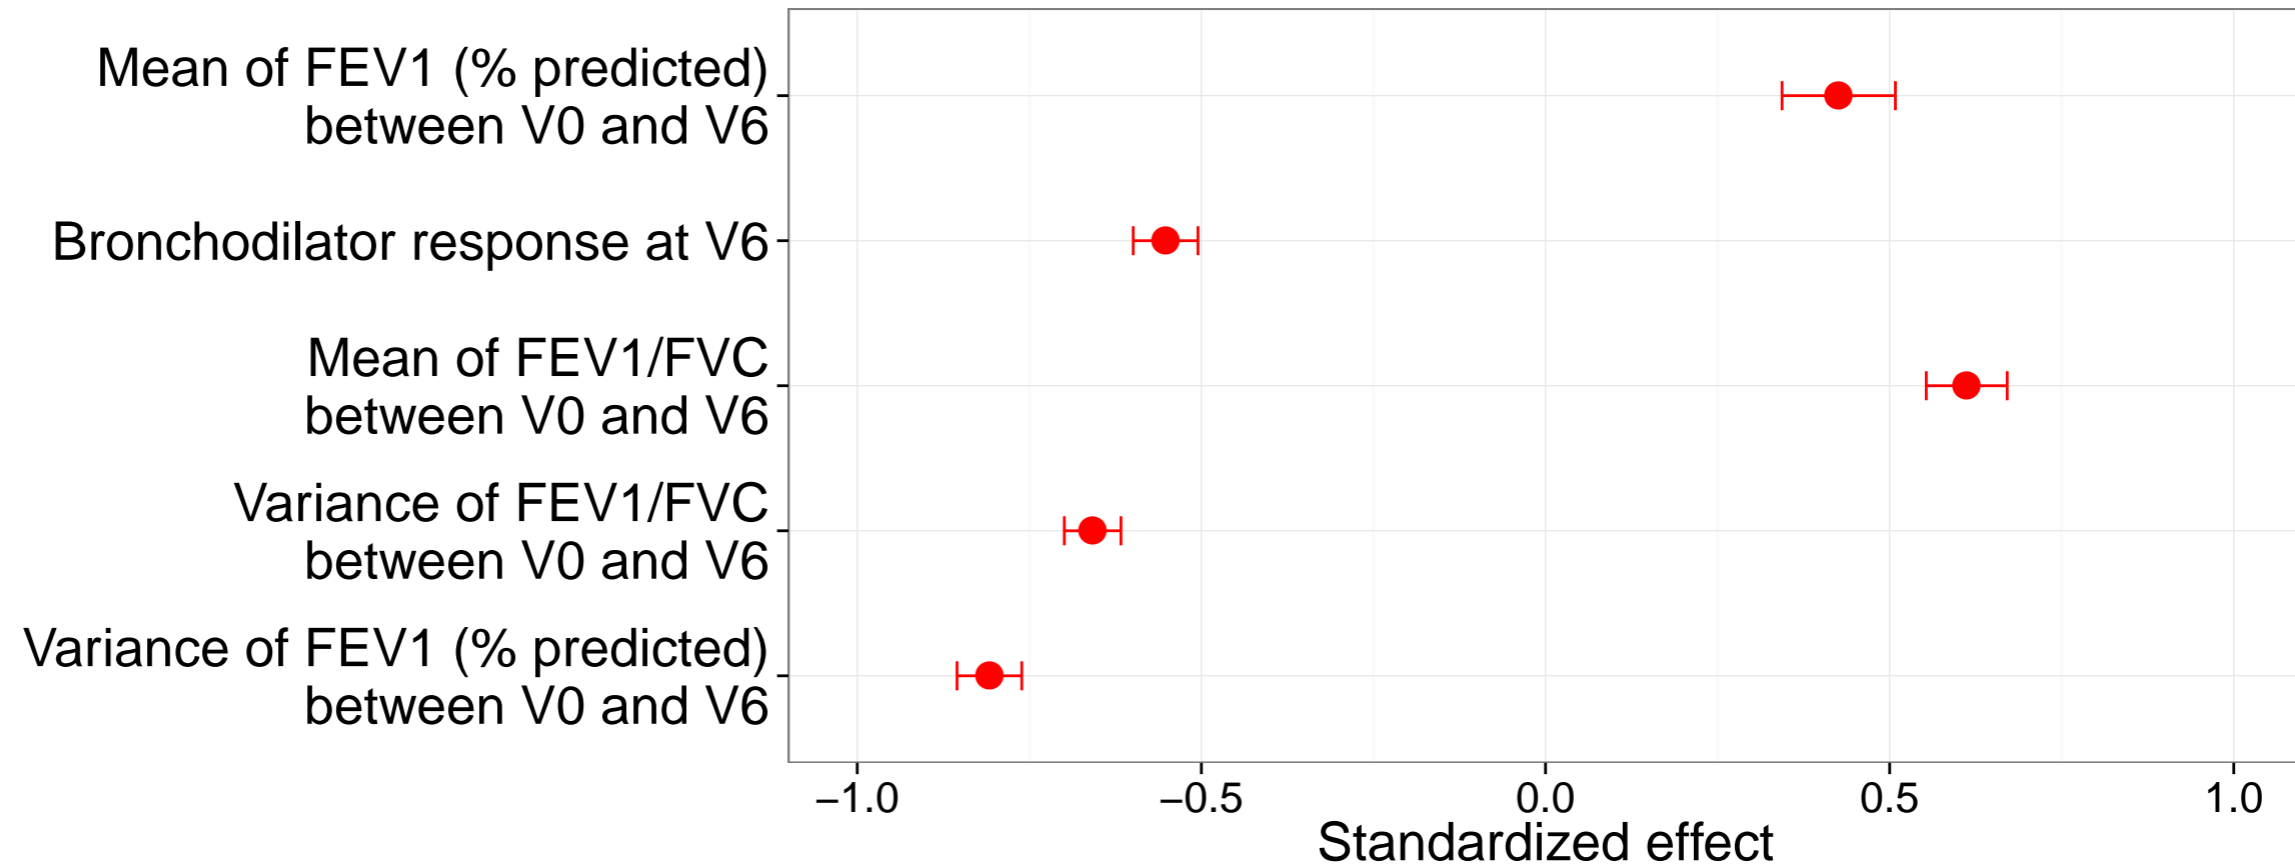

Supplement: NIHMS814026-supplement-4.pdf [file NIHMS814026-supplement-4.pdf]

## E. Standardized effect of Rhinitis Severity on observed variables.

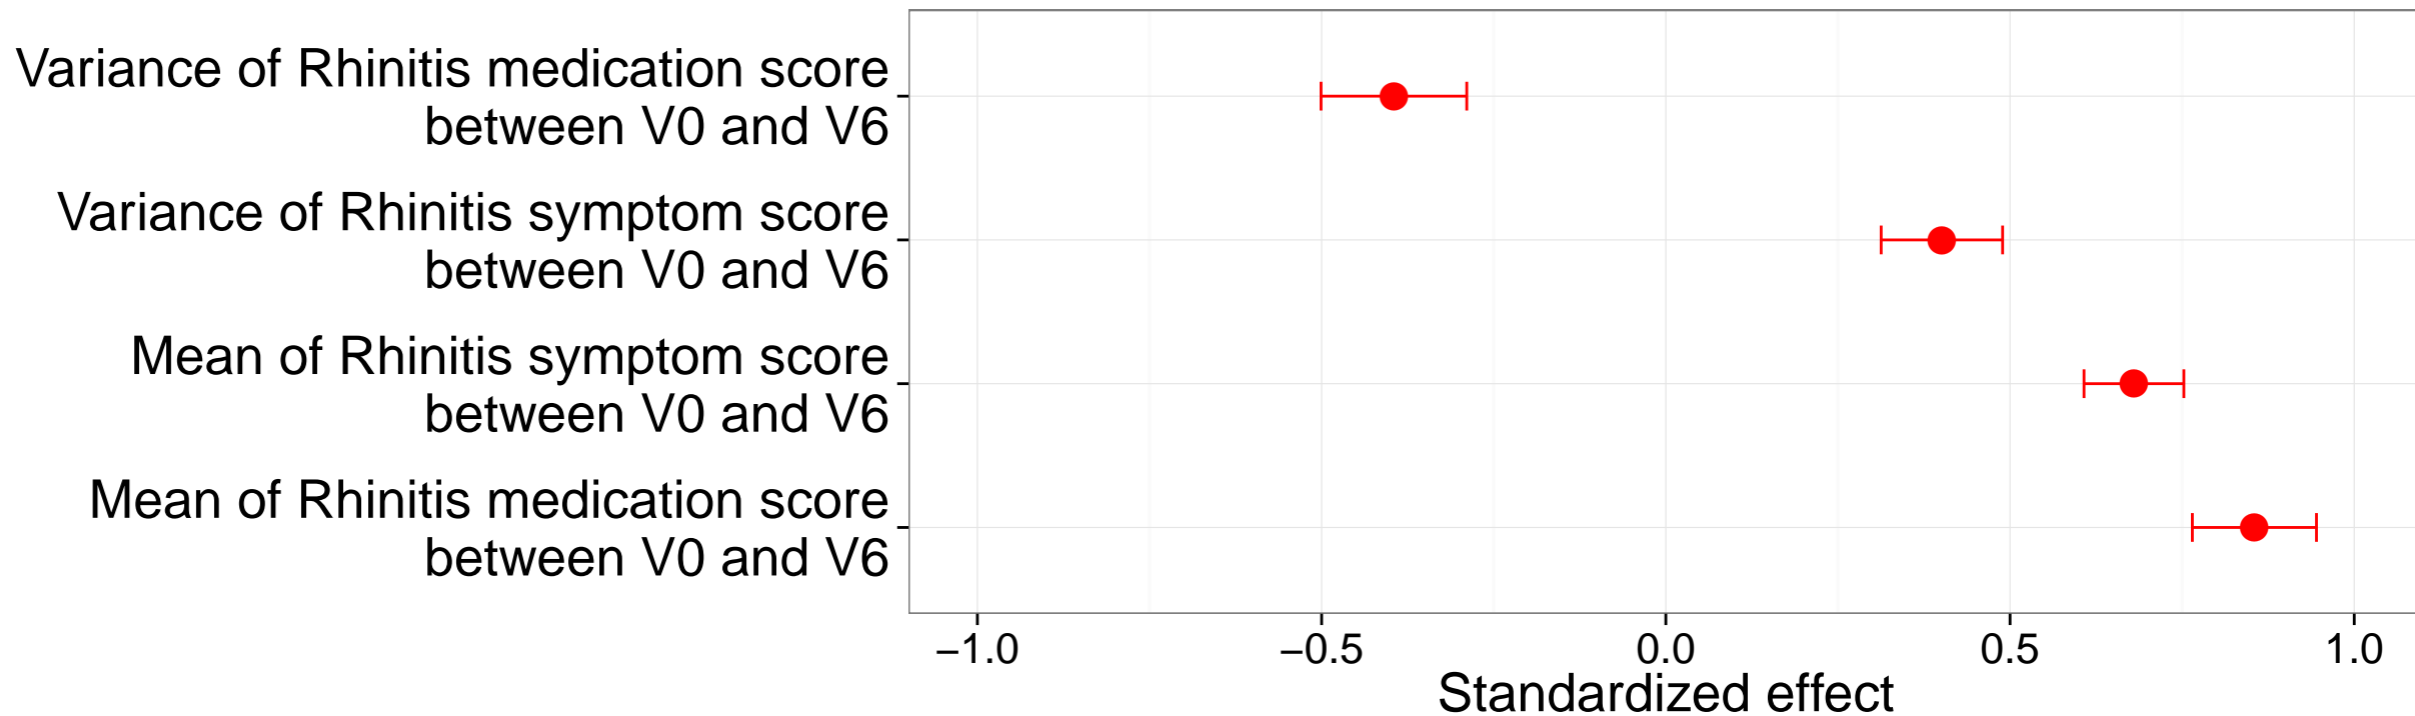

Supplement: NIHMS814026-supplement-5.pdf [file NIHMS814026-supplement-5.pdf]

## F. Standardized effect of ETS Exposure on observed variables.

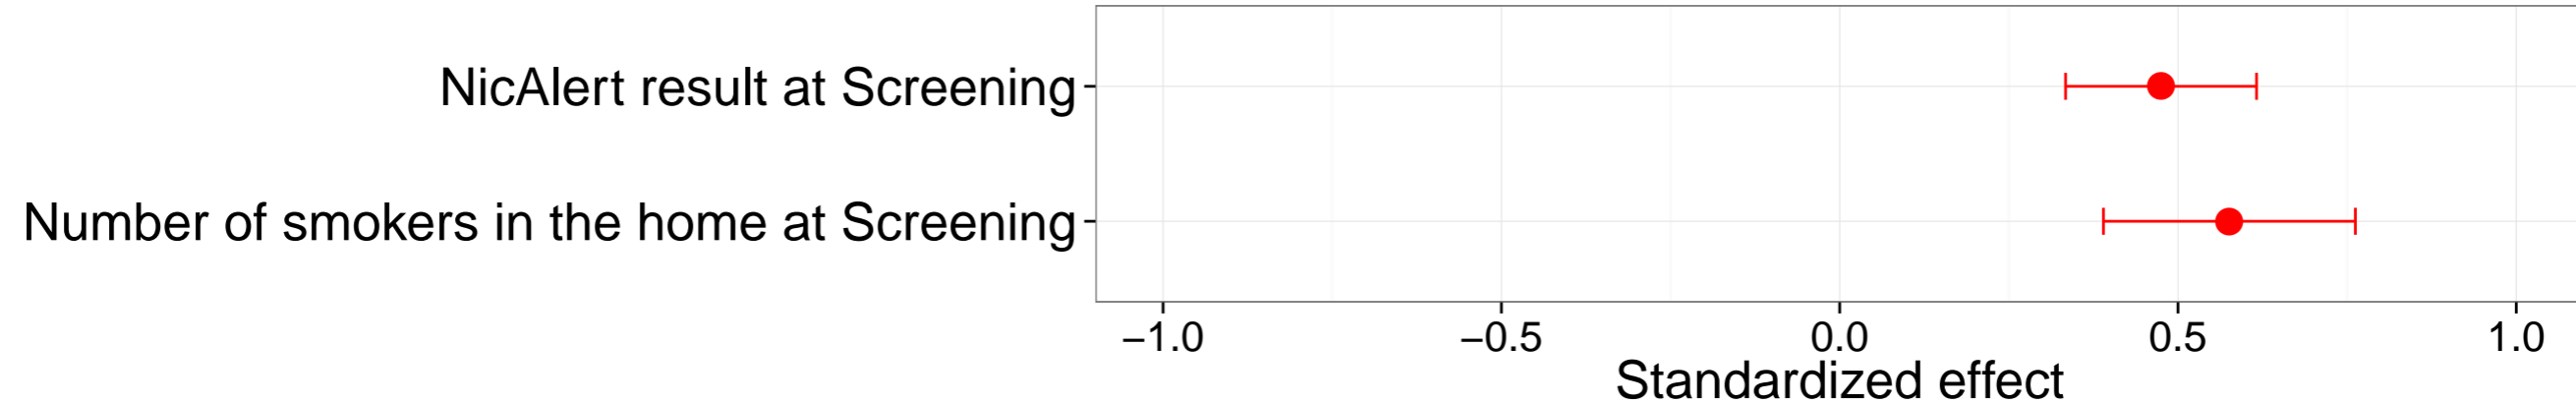

Supplement: NIHMS814026-supplement-6.pdf [file NIHMS814026-supplement-6.pdf]
